# Supplementary material for: Rare protein-altering variants in ANGPTL7 lower intraocular pressure and protect against glaucoma
Source: PLoS Genet. 2020 May 5;16(5):e1008682. doi: 10.1371/journal.pgen.1008682 (PMC7199928; doi:10.1371/journal.pgen.1008682)
Supplement: S1 Table — List of UK Biobank phenotypes analyzed in the study. Phenotype name, the source field ID in UK Biobank (UKB Field ID), phenotype ID in Global Biobank Engine (GBE ID), the number of individuals (N) are shown. (XLSX) [file pgen.1008682.s014.xlsx]

## Sheet: Sheet1
Phenotype name	UKB Field ID	GBE ID	N
Goldmann-correlated IOP (right)	5255	INI5255	81523
Goldmann-correlated IOP (left)	5263	INI5263	81401
Goldmann-correlated IOP (median)	N/A	INI2005255	82253
corneal-compensated IOP (right)	5254	INI5254	81523
corneal-compensated IOP (left)	5262	INI5262	81401
corneal-compensated IOP (median)	N/A	INI2005254	82253
Glaucoma	20002, 41202, 41204, 40001, 40002	HC276	4,238 cases 250,660 controls
