# Supplementary material for: Rare protein-altering variants in ANGPTL7 lower intraocular pressure and protect against glaucoma
Source: PLoS Genet. 2020 May 5;16(5):e1008682. doi: 10.1371/journal.pgen.1008682 (PMC7199928; doi:10.1371/journal.pgen.1008682)
Supplement: S2 Data — The PheWAS results for ANGPTL7 p.Arg220Cys allele for eye-related phenotypes in FinnGen. The phenotype (phenotype_code and phenotype_string), phenotype category (category), beta value (beta), odds ratio (odds_ratio), and p-value (pval) of the association are shown for each of the eye phenotypes. (XLSX) [file pgen.1008682.s012.xlsx]

## Sheet: S2_Data
category	phenotype_code	phenotype_string	beta	pval	odds_ratio
Diseases of the eye and adnexa	H7_GLAUCOMA	Glaucoma	-0.3457	1.948e-12	0.707725
Diseases of the eye and adnexa	H7_GLAUCPRIMOPEN	Primary open-angle glaucoma	-0.3816	1.349e-08	0.682768
Diseases of the eye and adnexa	H7_GLAUCSUSP	Glaucoma suspect	-0.3221	2.934e-07	0.724626
Diseases of the eye and adnexa	H7_GLAUCOMA_POAG	Primary open-angle glaucoma, strict	-0.375	7.245e-07	0.687289
Diseases of the eye and adnexa	H7_GLAUCOMA_XFG	Glaucoma, exfoliation	-0.4354	6.676e-05	0.647006
Diseases of the eye and adnexa	H7_GLAUCCLOSEPRIM	Primary angle-closure glaucoma	-0.5194	0.001612	0.594877
Diseases of the eye and adnexa	H7_GLAUCOMAMEDICATION	Use of antiglaucoma preparations and miotics	-0.3233	0.004951	0.723757
Diseases of the eye and adnexa	H7_GLAUCNAS	Other and unspecified glaucoma	-0.4354	0.005758	0.647006
Diseases of the eye and adnexa	H7_RETINOCHISISCYST	Retinoschisis and retinal cysts	0.6936	0.006804	2.00091
Diseases of the eye and adnexa	H7_CHOROIDOTH	Other disorders of choroid	-0.7872	0.008599	0.455117
Diseases of the eye and adnexa	H7_RETINAHAEMORR	Retinal haemorrhage	0.6805	0.01142	1.97486
Diseases of the eye and adnexa	H7_RETINOPATHYDIAB_BKG_SEVERE	Severe diabetic background retinopathy	0.3897	0.04273	1.47654
Diseases of the eye and adnexa	H7_AMD	Age-related macular degeneration (whether dry or wet)	-0.1365	0.06379	0.872406
Diseases of the eye and adnexa	H7_RETINOPATHYDIAB	Diabetic retinopathy	0.1301	0.06785	1.13894
Diseases of the eye and adnexa	H7_GLAUCOMA_NTG	Normotensive glaucoma	-0.2538	0.0697	0.775847
Diseases of the eye and adnexa	WET_AMD	Wet age-related macular degeneration	-0.1655	0.089	0.84747
Diseases of the eye and adnexa	H7_MACULADEGEN	Degeneration of macula and posterior pole	-0.0935	0.09465	0.910738
Diseases of the eye and adnexa	H7_HYPERMETRO	Hypermetropia	-0.2519	0.0952	0.777322
Diseases of the eye and adnexa	H7_CATARACTOTHER	Other cataract	-0.0815	0.1025	0.921733
Diseases of the eye and adnexa	H7_VISDISTNAS	Other and unspecified visual disturbances	0.223	0.1055	1.24982
Diseases of the eye and adnexa	H7_ANOMAPUPFUNC	Anomalies of pupillary function	0.4493	0.1098	1.56721
Diseases of the eye and adnexa	H7_PAPILLOEDEMA	Papilloedema, unspecified	0.4346	0.1198	1.54435
Diseases of the eye and adnexa	MACULAR_HOLE	Macular hole	0.2745	0.1281	1.31587
Diseases of the eye and adnexa	H7_OPTNEUROTH	Other disorders of optic [2nd] nerve and visual pathways	0.2282	0.1291	1.25634
Diseases of the eye and adnexa	MACULAR_CYST	Macular cyst	-0.4699	0.1305	0.625065
Diseases of the eye and adnexa	H7_ENTROPION	Entropion and trichiasis of eyelid	-0.1919	0.1326	0.825389
Diseases of the eye and adnexa	H7_MYOPIA	Myopia	0.1533	0.1371	1.16567
Diseases of the eye and adnexa	H7_EYELIDDIS	Other disorders of eyelid	-0.0757	0.143	0.927094
Diseases of the eye and adnexa	H7_OPTNERVE	Disorders of optic nerve and visual pathways	0.1682	0.1463	1.18317
Diseases of the eye and adnexa	H7_PTERYGIUM	Pterygium	-0.3102	0.153	0.7333
Diseases of the eye and adnexa	H7_DIPLOPIA	Diplopia	-0.1376	0.1631	0.871447
Diseases of the eye and adnexa	H7_PARASTRA6	Sixth [abducent] nerve palsy	-0.2918	0.1656	0.746918
Diseases of the eye and adnexa	H7_BCKRNDRETINOPAT	Background retinopathy and retinal vascular changes	-0.3251	0.1679	0.722455
Diseases of the eye and adnexa	H7_ASTIGMATISM	Astigmatism	0.2155	0.1808	1.24048
Diseases of the eye and adnexa	H7_RETINASEPAR	Separation of retinal layers (serosa)	-0.2316	0.2008	0.793263
Diseases of the eye and adnexa	H7_KERATOCONUS	Hereditary corneal dystrophies	0.2932	0.2022	1.34071
Diseases of the eye and adnexa	H7_RETINOPATHYDIAB_BKG	Diabetic background retinopathy	0.1187	0.2036	1.12603
Diseases of the eye and adnexa	H7_RETINOPATHYDIAB_PROLIF	Proliferative diabetic retinopathy	0.1434	0.2056	1.15419
Diseases of the eye and adnexa	H7_VITROPACIT	Other vitreous opacities	-0.2317	0.2195	0.793184
Diseases of the eye and adnexa	H7_PERIPHRETINADEGEN	Peripheral retinal degeneration	0.24	0.2215	1.27125
Diseases of the eye and adnexa	H7_VISFIELDDEF	Visual field defects	0.1469	0.2233	1.15824
Diseases of the eye and adnexa	H7_HORDEOLUM	Hordeolum and other deep inflammation of eyelid	0.201	0.225	1.22262
Diseases of the eye and adnexa	H7_VASCCILIARY	Hyphaema and other vascular disorders of iris and ciliary body	0.3449	0.2294	1.41185
Diseases of the eye and adnexa	H7_KERATITISINOTH	Keratitis and keratoconjunctivitis in other diseases classified elsewhere	-0.2212	0.2333	0.801556
Diseases of the eye and adnexa	H7_VISUDISTURBSUB	Subjective visual disturbances	-0.0879	0.2351	0.915852
Diseases of the eye and adnexa	H7_GLAUCSECDISEASE	Glaucoma secondary to other eye disorders	-0.2057	0.2469	0.814077
Diseases of the eye and adnexa	H7_BLINDANDVISIMPAIRMENT	Visual impairment including blindness (binocular or monocular)	-0.1569	0.2531	0.85479
Diseases of the eye and adnexa	H7_MODVISIMPBINOC	Moderate visual impairment, binocular	-0.2297	0.256	0.794772
Diseases of the eye and adnexa	H7_LACRIMALORBITINOTH	Disorders of lacrimal system and orbit in diseases classified elsewhere	-0.2524	0.2577	0.776934
Diseases of the eye and adnexa	MACULA_NAS	Degenerative macular diseases	-0.1127	0.261	0.893419
Diseases of the eye and adnexa	H7_RETINANAS	Other specified and unspecified retinal disorders	-0.2273	0.2758	0.796682
Diseases of the eye and adnexa	H7_CHORIORETINFLAM	Chorioretinal inflammation	-0.2229	0.2978	0.800195
Diseases of the eye and adnexa	H7_MACULOPATHYDIAB	Diabetic maculopathy	0.1029	0.3036	1.10838
Diseases of the eye and adnexa	H7_RETINALBREAK	Retinal breaks without detachment	-0.0942	0.3046	0.910101
Diseases of the eye and adnexa	H7_OPTNERVNAS	Disorders of optic nerve, not elsewhere classified	0.2709	0.3055	1.31114
Diseases of the eye and adnexa	H7_PARASTRA3	Third [oculomotor] nerve palsy	0.2641	0.3426	1.30226
Diseases of the eye and adnexa	H7_VISUALDISTBLIND	Visual disturbances and blindness	-0.0442	0.3449	0.956763
Diseases of the eye and adnexa	H7_RETINALDETACHBREAK	Retinal detachment with retinal break	-0.0887	0.3473	0.91512
Diseases of the eye and adnexa	H7_OCUPAIN	Ocular pain	-0.1257	0.358	0.881879
Diseases of the eye and adnexa	H7_PTOSIS	Ptosis of eyelid	0.0981	0.3842	1.10307
Diseases of the eye and adnexa	H7_VITROTH	Other and unspecified disorders of vitreous body	0.0495	0.3886	1.05075
Diseases of the eye and adnexa	H7_RETINALDETACHOTH	Other, unspecified and serous retinal detachments	-0.1728	0.4092	0.841306
Diseases of the eye and adnexa	H7_EYELIDINOTH	Disorders of eyelid in diseases classified elsewhere	-0.1516	0.4114	0.859332
Diseases of the eye and adnexa	DRY_AMD	Dry age-related macular degeneration (includes geographic atrophy)	-0.0714	0.4162	0.931089
Diseases of the eye and adnexa	H7_RETINOPATHYDIAB_NAS	Other diabetic retinopathy	0.1003	0.4395	1.1055
Diseases of the eye and adnexa	H7_IRIDOCYCLITISINOTH	Iridocyclitis in diseases classified elsewhere	-0.2161	0.4538	0.805655
Diseases of the eye and adnexa	H7_LENSDISLOCATIO	Dislocation of lens	-0.2166	0.4538	0.805252
Diseases of the eye and adnexa	H7_LACRIMALSYSTEM	Disorders of lacrimal system	0.039	0.4576	1.03977
Diseases of the eye and adnexa	H7_CORNEALNAS	Other and unspecified corneal deformities and disorders	-0.1397	0.4743	0.869619
Diseases of the eye and adnexa	H7_NYSTAGMUS	Nystagmus and other irregular eye movements	0.2316	0.4783	1.26062
Diseases of the eye and adnexa	H7_APHAKIA	Aphakia	-0.1815	0.4879	0.834018
Diseases of the eye and adnexa	H7_VISUDISTURB	Visual disturbances	-0.0339	0.4903	0.966668
Diseases of the eye and adnexa	H7_HETEROPHORIA	Heterophoria	0.0871	0.4938	1.09101
Diseases of the eye and adnexa	H7_LACRIMINFLAMCHRON	Inflammation of lacrimal passages (chronic)	-0.1707	0.4977	0.843074
Diseases of the eye and adnexa	H7_CONJUHAEMOR	conjunctival haemorrhage	0.0915	0.5324	1.09582
Diseases of the eye and adnexa	H7_PRESBYOPIA	Presbyopia	-0.1116	0.5358	0.894402
Diseases of the eye and adnexa	H7_SCLERACORNEA	Disorders of sclera, cornea, iris and ciliary body	0.0261	0.5389	1.02644
Diseases of the eye and adnexa	H7_DIVERGSTRAB	Divergent concomitant strabismus	-0.0667	0.5467	0.935476
Diseases of the eye and adnexa	H7_CONVERSTRAB	Convergent concomitant strabismus	-0.0784	0.5492	0.924595
Diseases of the eye and adnexa	H7_VITRBODYGLOBE	Disorders of vitreous body	0.0298	0.5537	1.03025
Diseases of the eye and adnexa	H7_PARASTRAB	Paralytic strabismus	-0.08	0.5607	0.923116
Diseases of the eye and adnexa	H7_USEOFEYEANTIALLERGENS	Use of eye-antiallergens (taken as indicator of allergic/atopic conjunctivitis)	0.0246	0.5676	1.02491
Diseases of the eye and adnexa	H7_CONJUNCTDEGDEPOT	conjunctival degenerations and deposits	0.1257	0.5691	1.13394
Diseases of the eye and adnexa	H7_EPISCLERITIS	Episcleritis	0.0896	0.5725	1.09374
Diseases of the eye and adnexa	H7_ALLERGICCONJUNCTIVITIS	Allergic conjunctivitis	0.0222	0.5985	1.02245
Diseases of the eye and adnexa	H7_VITREOUS	Disorders of vitreous body and globe	0.0239	0.6279	1.02419
Diseases of the eye and adnexa	H7_RETINALDETACH	Retinal detachments and breaks	-0.0272	0.6306	0.973167
Diseases of the eye and adnexa	H7_OTHERCONJ	Other disorders of conjunctiva	-0.0447	0.6388	0.956284
Diseases of the eye and adnexa	H7_EYEOTH	Other disorders of eye and adnexa	0.0417	0.6557	1.04258
Diseases of the eye and adnexa	H7_CONJUNCTIVITIS	Conjunctivitis	0.0155	0.6593	1.01562
Diseases of the eye and adnexa	H7_IRIDOCHRONIC	Chronic iridocyclitis	-0.0689	0.6744	0.93342
Diseases of the eye and adnexa	H7_STRABNAS	Other specified and unspecified strabismus	0.1425	0.6798	1.15315
Diseases of the eye and adnexa	H7_LACRIGLAND	Other disorders of lacrimal gland	0.0254	0.6834	1.02573
Diseases of the eye and adnexa	H7_GLAUCOMA_OPER	Glucoma-related operations	0.0756	0.6836	1.07853
Diseases of the eye and adnexa	H7_RETVASCNAS	Other and unspecified vascular occlusions	-0.0473	0.6882	0.953801
Diseases of the eye and adnexa	H7_BLEPHAROCHALASIS	Blepharochalasis	-0.0263	0.6886	0.974043
Diseases of the eye and adnexa	H7_KERATITIS	Keratitis	0.0217	0.6931	1.02194
Diseases of the eye and adnexa	H7_LAGOPHTALMOS	Lagophthalmos	-0.1313	0.6985	0.876955
Diseases of the eye and adnexa	H7_CONJUNCTIVITISACUNONATOPIC	Conjunctivitis (acute, non atopic)	-0.0237	0.7081	0.976579
Diseases of the eye and adnexa	H7_EXOPTHALMUS	Exophthalmic conditions	-0.1262	0.7104	0.881439
Diseases of the eye and adnexa	H7_OTHIRISCILIARY	Other disorders of iris and ciliary body	0.0864	0.7122	1.09024
Diseases of the eye and adnexa	H7_EYEADNEXOTH	Other specified and unspecified disorders of eye and adnexa	0.0563	0.7202	1.05792
Diseases of the eye and adnexa	H7_VERTISTRAB	Vertical strabismus	-0.069	0.7327	0.933327
Diseases of the eye and adnexa	H7_OTHRETARTOCC	Other retinal artery occlusion	0.084	0.7392	1.08763
Diseases of the eye and adnexa	H7_EYELIDINFLAMMATION	Other inflammation of eyelid	0.0374	0.7403	1.03811
Diseases of the eye and adnexa	H7_EYE	Diseases of the eye and adnexa	-0.0062	0.7416	0.993819
Diseases of the eye and adnexa	H7_ECTROPION	Ectropion of eyelid	0.0631	0.7527	1.06513
Diseases of the eye and adnexa	H7_OPTATROPHY	Optic atrophy	0.0892	0.7553	1.0933
Diseases of the eye and adnexa	H7_EPIPHORA	Epiphora	-0.0732	0.7608	0.929415
Diseases of the eye and adnexa	H7_ANISOMETROPIA	Anisometropia and aniseikonia	0.0653	0.7624	1.06748
Diseases of the eye and adnexa	H7_CONVERGINSUFF	Convergence insufficiency and excess	0.0871	0.7627	1.09101
Diseases of the eye and adnexa	H7_AMBLYANOPSIA	Amblyopia ex anopsia	-0.0527	0.7651	0.948665
Diseases of the eye and adnexa	H7_PARASTRA4	Fourth [trochlear] nerve palsy	-0.073	0.7792	0.929601
Diseases of the eye and adnexa	H7_OPTNEURITIS	Optic neuritis	0.0475	0.7834	1.04865
Diseases of the eye and adnexa	H7_LACRIMINFLAMACU	Inflammation of lacrimal passages (acute and unspecified)	0.0752	0.7838	1.0781
Diseases of the eye and adnexa	H7_SCLERITISEPISCLERITIS	Scleritis and episcleritis	0.0405	0.7855	1.04133
Diseases of the eye and adnexa	H7_STENOLACRI	Stenosis and insufficiency of lacrimal passages	0.0286	0.7955	1.02901
Diseases of the eye and adnexa	H7_STRABISMUS	Strabismus	-0.0153	0.8016	0.984816
Diseases of the eye and adnexa	H7_BINODISTOTH	Other disorders of binocular vision	-0.0688	0.8043	0.933513
Diseases of the eye and adnexa	H7_CENTRRETARTOCC	Central retinal artery occlusion	0.0657	0.8096	1.06791
Diseases of the eye and adnexa	H7_CONJUNCTIVA	Disorders of conjunctiva	0.008	0.8105	1.00803
Diseases of the eye and adnexa	MACULAR_PUCKER	Macular pucker	-0.0266	0.8234	0.973751
Diseases of the eye and adnexa	H7_LIDLACRIMALORBIT	Disorders of eyelid, lacrimal system and orbit	-0.0075	0.8256	0.992528
Diseases of the eye and adnexa	H7_CONJUNCTIVITISATOPIC	Atopic conjunctivitis	0.0347	0.8361	1.03531
Diseases of the eye and adnexa	H7_CONJUVASC	Other conjunctival vascular disorders and cysts	-0.0447	0.8509	0.956284
Diseases of the eye and adnexa	H7_OCUMUSCLE	Disorders of ocular muscles, binocular movement, accommodation and refraction	-0.0087	0.8541	0.991338
Diseases of the eye and adnexa	H7_RETINALDISOTH	Other retinal disorders	0.0072	0.8598	1.00723
Diseases of the eye and adnexa	H7_BINOCUMOVOTH	Other disorders of binocular movement	-0.04	0.8633	0.960789
Diseases of the eye and adnexa	H7_RETIVASCOCCLUSION	Retinal vascular occlusion	-0.0177	0.8649	0.982456
Diseases of the eye and adnexa	H7_CHALAZION	Chalazion	-0.0165	0.8663	0.983635
Diseases of the eye and adnexa	H7_RETINAVASC	Retinal vascular disorders	-0.0161	0.8754	0.984029
Diseases of the eye and adnexa	H7_CHOROIDRETINA	Disorders of choroid and retina	-0.0054	0.8763	0.994615
Diseases of the eye and adnexa	H7_IRIDONAS	Other and unspecified iridocyclitis	-0.0317	0.8778	0.968797
Diseases of the eye and adnexa	H7_HEREDRETINADYST	Hereditary retinal dystrophy	0.0414	0.8789	1.04227
Diseases of the eye and adnexa	H7_KERATITISOTH	Other keratitis	0.0158	0.8799	1.01593
Diseases of the eye and adnexa	H7_STRABOTH	Other strabismus	0.0084	0.9014	1.00844
Diseases of the eye and adnexa	H7_CATARACTSENILE	Senile cataract	-0.0038	0.9086	0.996207
Diseases of the eye and adnexa	H7_CORNEALOTH	Other disorders of cornea	0.0117	0.9213	1.01177
Diseases of the eye and adnexa	H7_INTERHETEROTRO	Intermittent heterotropia	-0.0137	0.9264	0.986393
Diseases of the eye and adnexa	H7_REFRAACCOMMODIS	Disorders of refraction and accommodation	-0.0061	0.9311	0.993919
Diseases of the eye and adnexa	H7_HERPESKERATITIS	Herpesviral keratitis and keratoconjunctivitis	-0.0137	0.9353	0.986393
Diseases of the eye and adnexa	H7_GLOBE	Disorders of globe	-0.0171	0.9386	0.983045
Diseases of the eye and adnexa	H7_VITRHAEMORR	Vitreous haemorrhage	-0.0058	0.9591	0.994217
Diseases of the eye and adnexa	H7_CONJUNCTIVITISCHRON	Chronic conjunctivitis	0.01	0.9607	1.01005
Diseases of the eye and adnexa	H7_CORNEALSCAR	Corneal scars and opacities	0.0111	0.9648	1.01116
Diseases of the eye and adnexa	H7_LENS	Disorders of lens	-0.0011	0.9708	0.998901
Diseases of the eye and adnexa	H7_CORNULCER	Corneal ulcer	-0.0011	0.9893	0.998901
Diseases of the eye and adnexa	H7_CORNEALDEFORM	Keratoconus	-0.0023	0.9919	0.997703
Diseases of the eye and adnexa	H7_ORBIT	Disorders of orbit	0.0014	0.9932	1.0014
Diseases of the eye and adnexa	H7_IRIDOCYCLITIS	Iridocyclitis	0.0002	0.9975	1.0002
Diseases of the eye and adnexa	H7_IRIDOACUTE	Acute and subacute iridocyclitis	0.0002	0.9979	1.0002
