# Supplementary material for: Rare protein-altering variants in ANGPTL7 lower intraocular pressure and protect against glaucoma
Source: PLoS Genet. 2020 May 5;16(5):e1008682. doi: 10.1371/journal.pgen.1008682 (PMC7199928; doi:10.1371/journal.pgen.1008682)
Supplement: S3 Table — Number of individuals stratified by genotype of rare (0.01% < MAF < 1%) protein-altering variants in ANGPTL7. The combination of genotypes is shown in the first four columns (rs200058074, rs28991002, rs28991009, and rs143435072) as well as the number of British individuals with the genotype combination in UK Biobank (n_observed). The expected number of individuals is computed under the Hardy-Weinberg equilibrium model and the independence assumption (n_expected, Method). (XLSX) [file pgen.1008682.s016.xlsx]

## Sheet: Sheet1
rs200058074	rs28991002	rs28991009	rs143435072	n_observed	n_expected
(p.Gln136Arg)	(p.Arg140His)	(p.Gln175His)	(p.Arg177Ter)
A/A	G/G	G/G	C/C	328492	329401
A/A	G/G	G/T	C/C	5395	5390.72
A/A	G/A	G/G	C/C	1693	1672.69
A/A	G/G	NA	C/C	471	470.71
A/G	G/G	G/G	C/C	356	353.03
A/A	G/G	G/G	C/T	270	267.8
A/A	NA	G/G	C/C	194	192.47
NA	G/G	G/G	C/C	192	188.77
A/A	G/G	G/G	NA	37	38.13
A/A	G/G	T/T	C/C	28	22.06
A/A	G/A	G/T	C/C	8	27.37
A/G	G/G	G/T	C/C	4	5.78
A/A	NA	G/T	C/C	2	3.15
A/A	G/A	G/G	NA	2	0.19
A/A	G/G	NA	C/T	2	0.38
NA	G/A	G/G	C/C	1	0.96
A/A	A/A	G/G	C/C	1	2.12
A/A	G/A	G/G	C/T	1	1.36
A/A	G/G	G/T	C/T	1	4.38
A/G	G/G	NA	C/C	1	0.5
