# Supplementary material for: Rare protein-altering variants in ANGPTL7 lower intraocular pressure and protect against glaucoma
Source: PLoS Genet. 2020 May 5;16(5):e1008682. doi: 10.1371/journal.pgen.1008682 (PMC7199928; doi:10.1371/journal.pgen.1008682)
Supplement: S4 Table — GCTA estimates of phenotypic variance explained by the 4 rare variants in ANGPTL7 for the IOP measures and glaucoma. The phenotype (Phenotype and GBE_ID), the estimated local heritability (V(G)/Vp), standard error (SE), and p-value (P) are shown. The SE and P are estimated based on from Jackknife method. (XLSX) [file pgen.1008682.s017.xlsx]

## Sheet: Sheet1
GBE ID	Phenotype	V(G)/Vp	SE	P
INI2005254	corneal-compensated IOP (median)	0.000330016	0.000139878	1.13e-20
INI2005255	Goldmann-correlated IOP (median)	0.000721422	0.000213613	2.63e-92
INI5254	corneal-compensated IOP (right)	0.000322549	0.000131891	1.1e-19
INI5255	Goldmann-correlated IOP (right)	0.000695921	0.000206618	2.3e-85
INI5262	corneal-compensated IOP (left)	0.000210965	0.0001204	3.52e-09
INI5263	Goldmann-correlated IOP (left)	0.000587128	0.000188193	1.17e-60
HC276	Glaucoma	4.49e-05	2.12e-05	8.49e-08
