# Supplementary material for: Rare protein-altering variants in ANGPTL7 lower intraocular pressure and protect against glaucoma
Source: PLoS Genet. 2020 May 5;16(5):e1008682. doi: 10.1371/journal.pgen.1008682 (PMC7199928; doi:10.1371/journal.pgen.1008682)
Supplement: S5 Table — ANGPTL7 IOP protein-altering variant association for 6 IOP measurements in UK Biobank. The association statistics for 6 IOP traits (corneal compensated IOP [median INI2005254, right: INI5254, and left: INI5262] and Goldman-correlated IOP [median INI2005255, right: INI5255, and left: INI5263]) are shown. The phenotype (GBE_ID), variant (chromosome, position, reference, and alternate allele [hg19]), rsID, the HGVS amino acid nomenclature (HGVSp), and the estimated regression coefficient with 95% confidence intervals (BETA [95% CI]), and p-value of association (P) are shown. (XLSX) [file pgen.1008682.s018.xlsx]

## Sheet: Sheet1
GBE_ID	variant	rsID	HGVSp	BETA [95% CI]	P
INI2005254	1:11252357:A:G	rs200058074	p.Gln136Arg	0.0124 [-0.203, 0.228]	0.91
INI2005254	1:11252369:G:A	rs28991002	p.Arg140His	-0.0714 [-0.165, 0.022]	0.133
INI2005254	1:11253684:G:T	rs28991009	p.Gln175His	-0.1552 [-0.207, -0.103]	5.96e-09
INI2005254	1:11253688:C:T	rs143435072	p.Arg177Ter	-0.1285 [-0.374, 0.117]	0.304
INI2005255	1:11252357:A:G	rs200058074	p.Gln136Arg	-0.0297 [-0.248, 0.189]	0.79
INI2005255	1:11252369:G:A	rs28991002	p.Arg140His	-0.1497 [-0.244, -0.055]	0.00186
INI2005255	1:11253684:G:T	rs28991009	p.Gln175His	-0.2004 [-0.253, -0.148]	1.07e-13
INI2005255	1:11253688:C:T	rs143435072	p.Arg177Ter	-0.2856 [-0.533, -0.038]	0.0239
INI5254	1:11252357:A:G	rs200058074	p.Gln136Arg	-0.0426 [-0.259, 0.174]	0.7
INI5254	1:11252369:G:A	rs28991002	p.Arg140His	-0.0991 [-0.193, -0.005]	0.0387
INI5254	1:11253684:G:T	rs28991009	p.Gln175His	-0.1517 [-0.204, -0.099]	1.64e-08
INI5254	1:11253688:C:T	rs143435072	p.Arg177Ter	-0.0502 [-0.296, 0.196]	0.689
INI5255	1:11252357:A:G	rs200058074	p.Gln136Arg	-0.0380 [-0.256, 0.180]	0.733
INI5255	1:11252369:G:A	rs28991002	p.Arg140His	-0.1555 [-0.250, -0.061]	0.0013
INI5255	1:11253684:G:T	rs28991009	p.Gln175His	-0.2003 [-0.253, -0.147]	1.47e-13
INI5255	1:11253688:C:T	rs143435072	p.Arg177Ter	-0.2626 [-0.511, -0.014]	0.0381
INI5262	1:11252357:A:G	rs200058074	p.Gln136Arg	0.0657 [-0.152, 0.283]	0.554
INI5262	1:11252369:G:A	rs28991002	p.Arg140His	-0.0595 [-0.153, 0.035]	0.215
INI5262	1:11253684:G:T	rs28991009	p.Gln175His	-0.1333 [-0.186, -0.081]	7.01e-07
INI5262	1:11253688:C:T	rs143435072	p.Arg177Ter	-0.1771 [-0.423, 0.068]	0.157
INI5263	1:11252357:A:G	rs200058074	p.Gln136Arg	-0.0175 [-0.237, 0.202]	0.876
INI5263	1:11252369:G:A	rs28991002	p.Arg140His	-0.1549 [-0.250, -0.060]	0.00137
INI5263	1:11253684:G:T	rs28991009	p.Gln175His	-0.1815 [-0.235, -0.128]	2.24e-11
INI5263	1:11253688:C:T	rs143435072	p.Arg177Ter	-0.2731 [-0.521, -0.025]	0.0307
