# Supplementary material for: Rare protein-altering variants in ANGPTL7 lower intraocular pressure and protect against glaucoma
Source: PLoS Genet. 2020 May 5;16(5):e1008682. doi: 10.1371/journal.pgen.1008682 (PMC7199928; doi:10.1371/journal.pgen.1008682)
Supplement: S6 Table — Pairwise genetic correlation of IOP phenotypes. The genetic correlation (rg) for pairs of traits (Trait 1 and Trait 2, shown as GBE ID for 6 IOP traits (corneal compensated IOP [median INI2005254, right: INI5254, and left: INI5262] and Goldman-correlated IOP [median INI2005255, right: INI5255, and left: INI5263]) is shown with the standard error estimates (SE) based on Jackknife. (XLSX) [file pgen.1008682.s019.xlsx]

## Sheet: Sheet1
Trait 1	Trait 2	rg	SE
INI2005254	INI2005255	0.821284	0.0212266
INI2005254	INI5254	0.985296	0.0434097
INI2005254	INI5255	0.811856	0.0406103
INI2005254	INI5262	0.998911	0.0434669
INI2005254	INI5263	0.835363	0.039526
INI2005255	INI5254	0.798462	0.039117
INI2005255	INI5255	1.0073	0.0258203
INI2005255	INI5262	0.75938	0.043236
INI2005255	INI5263	0.993736	0.0259505
INI5254	INI5255	0.824087	0.0251798
INI5254	INI5262	0.984819	0.0567066
INI5254	INI5263	0.858557	0.0458405
INI5255	INI5262	0.748673	0.0485872
INI5255	INI5263	0.990019	0.0319751
INI5262	INI5263	0.803338	0.0292724
