# Supplementary material for: Rare protein-altering variants in ANGPTL7 lower intraocular pressure and protect against glaucoma
Source: PLoS Genet. 2020 May 5;16(5):e1008682. doi: 10.1371/journal.pgen.1008682 (PMC7199928; doi:10.1371/journal.pgen.1008682)
Supplement: S7 Table — Glaucoma definitions in FinnGen. ICD-codes are used in the Finnish hospital discharge and cause-of-death registries. ATC-codes are used in the Social Insurance Institution prescription drug purchase registry. All endpoint definitions in the FinnGen phenome-wide association analysis are available online (https://www.finngen.fi/fi/node/68). (XLSX) [file pgen.1008682.s020.xlsx]

## Sheet: Sheet1
Phenotype name	ICD-10	ICD-9	ICD-8	ATC (drug purchases)
Glaucoma (broad definition, the combination of all the subphenotypes below)	Any of the below	Any of the below	Any of the below	S01EA
Glaucoma suspect	H40.0	3650	375,97
Primary open-angle glaucoma	H40.1	3651	375,1[0-3] (excluding: 375,11)
Primary open-angle glaucoma, strict	H40.1 (excluding: H40.10, H40.12)	3651A, 3651C	375,10
Glaucoma, exfoliation	H40.10	3651B	375,12
Normotensive glaucoma	H40.11	3651C
Primary angle-closure glaucoma	H40.2	3652	375,00|375,11
Glaucoma secondary to eye trauma	H40.3	3656E
Glaucoma secondary to eye inflammation	H40.4	3656F,3656B	364,01
Glaucoma secondary to other eye disorders	H40.5	3655,3656A
Glaucoma secondary to drugs	H40.6	3653A
Other and unspecified glaucoma	H40.[8-9]	3656X,3656C,365[8-9]	375,2,375,9 (exclude: 375,97)
Glaucoma in diseases classified elsewhere	H42	3654A
Use of antiglaucoma preparations and miotics			S01EA
