# Supplementary material for: Rare protein-altering variants in ANGPTL7 lower intraocular pressure and protect against glaucoma
Source: PLoS Genet. 2020 May 5;16(5):e1008682. doi: 10.1371/journal.pgen.1008682 (PMC7199928; doi:10.1371/journal.pgen.1008682)
Supplement: S9 Table — ANGPTL7 protein-altering variant association with reproductive fitness, (A) the number of live births and (B) the number of children fathered. Variant includes chromosome, position, reference, and alternate allele (hg19). rsID—the rs identifier of the genetic variant. HGVSp—the HGVS protein sequence name. MAF—the minor allele frequency in UK Biobank British population. Beta—estimated regression coefficient with 95% confidence intervals. P—p-value of association. (XLSX) [file pgen.1008682.s022.xlsx]

## Sheet: Sheet1
A. Number of live births
Variant	rsID	HGVSp	MAF	Dosage	Beta [95% CI]	P
1:11252357:A:G	rs200058074	p.Gln136Arg	0.00054	Gln/Arg	0.089 [-0.064, 0.24]	0.26
1:11252369:G:A	rs28991002	p.Arg140His	0.0025	Arg/His	0.29 [-1.9, 2.5]	0.8
1:11253684:G:T	rs28991009	p.Gln175His	0.0081	Gln/His	-0.0076 [-0.050, 0.035]	0.72
				His/His	0.23 [-0.48, 0.93]	0.52
1:11253688:C:T	rs143435072	p.Arg177Ter	0.00041	Arg/Ter	0.2 [0.021, 0.38]	0.029
B. Number of children fathered
Variant	rsID	HGVSp	MAF	Dosage	Beta [95% CI]	P
1:11252357:A:G	rs200058074	p.Gln136Arg	0.00054	Gln/Arg	0.0064 [-0.19, 0.21]	0.95
1:11252369:G:A	rs28991002	p.Arg140His	0.0025	Arg/His	0.0030 [-0.081, 0.087]	0.94
1:11253684:G:T	rs28991009	p.Gln175His	0.0081	Gln/His	-0.0052 [-0.054, 0.044]	0.83
				His/His	0.41 [-0.17, 0.98]	0.16
1:11253688:C:T	rs143435072	p.Arg177Ter	0.00041	Arg/Ter	-0.052 [-0.27, 0.17]	0.64
